# Supplementary material for: Prussian blue derived Fe2N for efficiently improving the photocatalytic hydrogen evolution activity of g-C3N4 nanosheets
Source: Royal Society of Chemistry journal article supplement (doi:10.1039/c9cy00198k), 2019-01-01
Supplement: c9cy00198k1.pdf [file c9cy00198k1.pdf]

**Electronic Supplementary Information for**  
**Prussian blue derived Fe<sub>2</sub>N for efficiently improving**  
**photocatalytic hydrogen evolution activity of g-C<sub>3</sub>N<sub>4</sub> nanosheets**

Weiliang Qi,<sup>a</sup> Siqi Liu,<sup>\*b,c</sup> Fei Li,<sup>\*a</sup> Heng Jiang,<sup>\*a</sup> Zhixing Cheng,<sup>b,c</sup> Shanlin Zhao<sup>a</sup>  
and Minghui Yang<sup>\*b,c</sup>

<sup>a</sup>*College of Chemistry, Chemical Engineering and Environment Engineering, Liaoning Shihua University, Fushun 113001, PR China*

<sup>b</sup>*Ningbo Institute of Materials Technology and Engineering, Chinese Academy of Sciences, Ningbo 315201, PR China*

<sup>c</sup>*Center of Materials Science and Optoelectronics Engineering, University of Chinese Academy of Sciences, Beijing 100049, China*

<sup>\*a</sup>*E-mail: weizn@126.com, hjiang78@hotmail.com.*

<sup>\*b,c</sup>*E-mail: myang@nimte.ac.cn, liusiqi@nimte.ac.cn.*

# Table of contents

## I. Experimental Procedures

### Electrochemical Measurements

## II. Supplementary illustrations and explanations

**Scheme S1.** The schematic illustration for the preparation of Fe<sub>2</sub>N and g-C<sub>3</sub>N<sub>4</sub> nanosheets.

**Fig. S1** (a) TEM and (b) HRTEM images image of Fe<sub>2</sub>N nanoparticles. (c) The diameters statistic histogram of Fe<sub>2</sub>N Nanoparticles.

**Fig. S2** The EDS mapping of the Fe<sub>2</sub>N nanoparticles.

**Fig. S3** The X-ray photoelectron survey spectrum of Fe<sub>2</sub>N nanoparticles.

**Fig. S4** Electrical impedance spectra of Prussian Blue nanocubes and Fe<sub>2</sub>N nanoparticles.

**Fig. S5** UV-vis absorption spectra of Prussian Blue nanocubes and Fe<sub>2</sub>N nanoparticles.

**Fig. S6** (a) The FT-IR spectra of pure g-C<sub>3</sub>N<sub>4</sub>, CTAB modified g-C<sub>3</sub>N<sub>4</sub> and g-C<sub>3</sub>N<sub>4</sub>-Fe<sub>2</sub>N nanocomposites. (b) Zeta potential measurements of Fe<sub>2</sub>N nanoparticles. (c) XRD pattern of pure g-C<sub>3</sub>N<sub>4</sub> and a series of g-C<sub>3</sub>N<sub>4</sub>-Fe<sub>2</sub>N nanocomposites.

**Fig. S7** HRTEM image of pure g-C<sub>3</sub>N<sub>4</sub> nanosheets.

**Fig. S8** (a) The X-ray photoelectron survey spectrum of g-C<sub>3</sub>N<sub>4</sub> and g-C<sub>3</sub>N<sub>4</sub>-Fe<sub>2</sub>N. High-resolution spectrum of (b) C 1s and (c) N 1s for g-C<sub>3</sub>N<sub>4</sub> and g-C<sub>3</sub>N<sub>4</sub>-Fe<sub>2</sub>N. High-resolution spectrum of (d) Fe 2P for g-C<sub>3</sub>N<sub>4</sub>-Fe<sub>2</sub>N and pure Fe<sub>2</sub>N.

**Fig. S9** Tauc plots of the UV-vis spectra for a series of samples.

**Fig. S10** Time-dependent photocatalytic H<sub>2</sub> evolution over the g-C<sub>3</sub>N<sub>4</sub>-Fe<sub>2</sub>N nanocomposites with different ratio of Fe<sub>2</sub>N.

**Fig. S11** Stability examination of H<sub>2</sub> production (evacuation every 3 h) for the g-C<sub>3</sub>N<sub>4</sub>-7%Fe<sub>2</sub>N sample.

**Fig. S12.** The SEM image of the reacted g-C<sub>3</sub>N<sub>4</sub>-7%Fe<sub>2</sub>N sample.

**Fig. S13.** N<sub>2</sub> adsorption-desorption isotherms and the corresponding pore size distribution curves (inset) of g-C<sub>3</sub>N<sub>4</sub> and g-C<sub>3</sub>N<sub>4</sub>-7%Fe<sub>2</sub>N.

**Table S1.** Pore Structure Parameters of g-C<sub>3</sub>N<sub>4</sub> and g-C<sub>3</sub>N<sub>4</sub>-7%Fe<sub>2</sub>N.

**Table S2.** Representative summary on photocatalytic activity of non-noble based photocatalysts toward water splitting.

## III. Supplementary References

## I. Experimental Procedures

**Electrochemical Measurements:** The electrochemical tests were conducted on an electrochemical workstation (CHI760E, CH Instrument) with a conventional three electrode cell. A Pt plate was employed as the counter electrode and an Ag/AgCl electrode was used as the reference electrode. The working electrode was prepared on fluorine-doped tin oxide (FTO) glass that was cleaned by sonication in ethanol for 30 min and dried at 353 K. The boundary of FTO glass was protected using the scotch tape. The 5 mg sample and 30  $\mu\text{L}$  Nafion solution (5 wt%) were dispersed in 1 mL of DMF by sonication to get slurry. Then, 40  $\mu\text{L}$  of slurry was spread onto the pretreated FTO glass. After air at room temperature, the working electrode was further dried at 393 K for 2 h to improve adhesion. Then, the scotch tape was unstuck, and the uncoated part of the electrode was isolated with epoxy resin. The exposed area of the working electrode was  $0.25\text{ cm}^2$ . The photocurrent measurements were carried out with the electrolyte was 0.2 M aqueous  $\text{Na}_2\text{SO}_4$  solution. The electrochemical impedance spectroscopy (EIS) measurements were performed in 0.2 M aqueous  $\text{Na}_2\text{SO}_4$  solution by applying an AC voltage with -1.3 mV amplitude in a frequency range from 1 Hz to 100 kHz. The polarization curve is performed in the same above mentioned three-electrode system, while the bias sweep range is from -1.6 to 0 V vs Ag/AgCl the electrolyte was 0.2 M aqueous  $\text{Na}_2\text{SO}_4$  solution.

## II. Supplementary illustrations and explanations

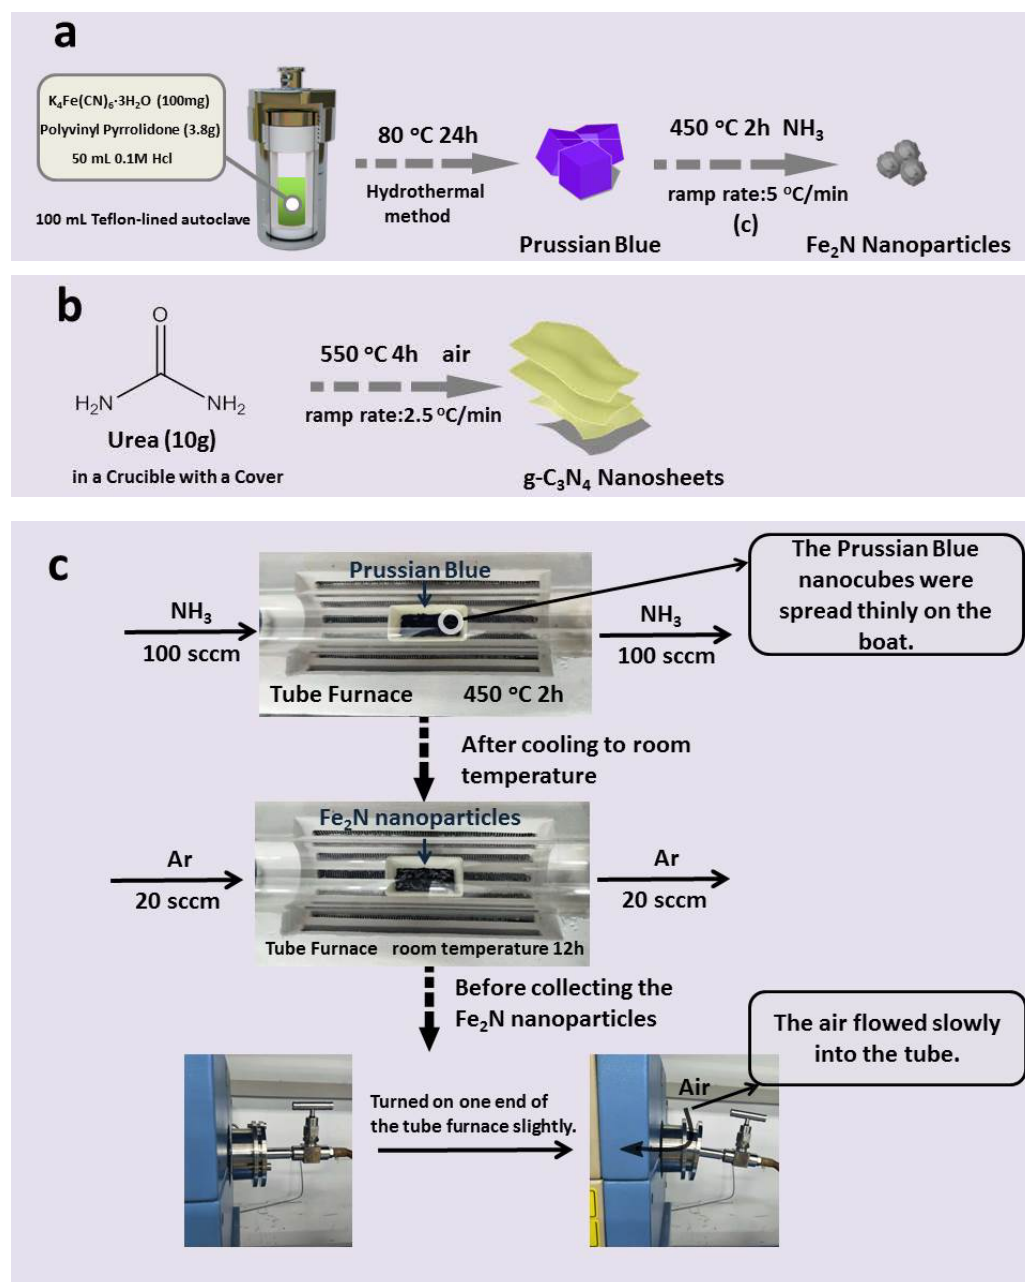

**Scheme S1.** The schematic illustration for the preparation of  $Fe_2N$  and  $g-C_3N_4$  nanosheets.

**Note:** Scheme S1 c is the concrete step and matters need attention of the synthesis of  $Fe_2N$  nanoparticles by Prussian Blue nanocubes.

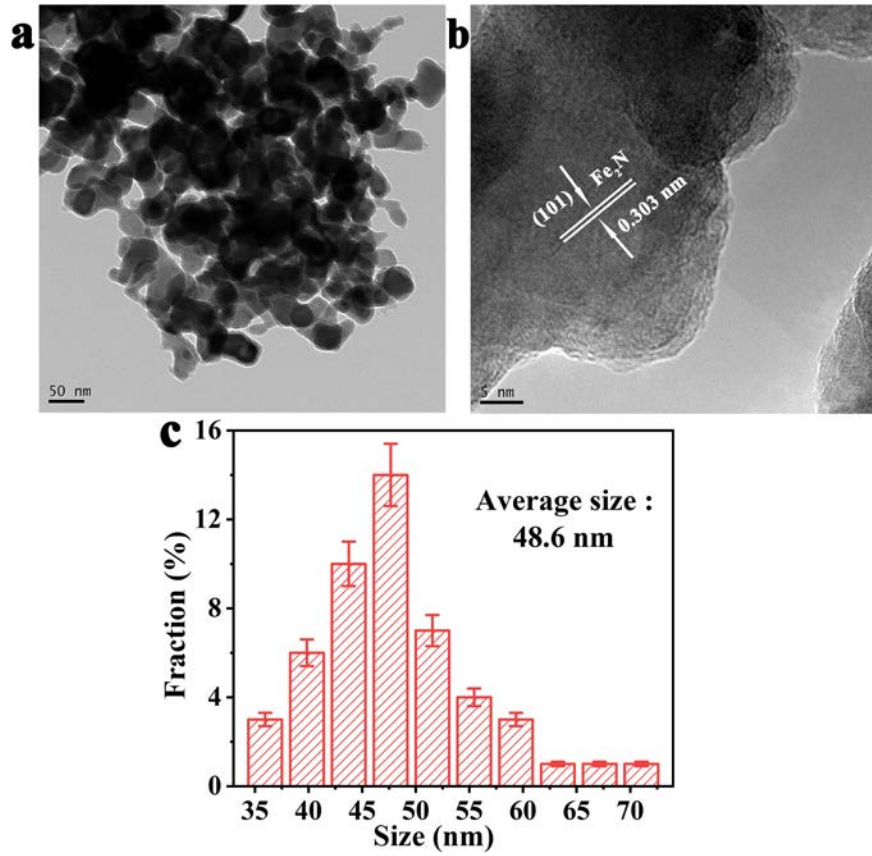

**Fig. S1** (a) TEM and (b) HRTEM images of Fe<sub>2</sub>N nanoparticles. (c) The diameters statistic histogram of Fe<sub>2</sub>N Nanoparticles.

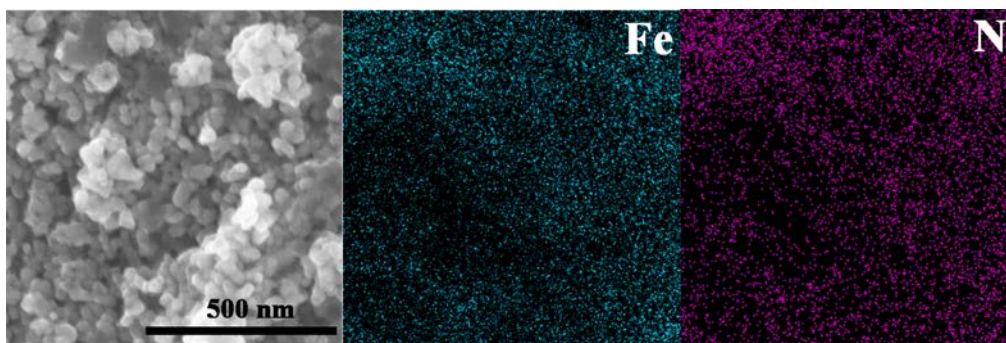

Fig. S2 The EDS mapping of the Fe<sub>2</sub>N nanoparticles.

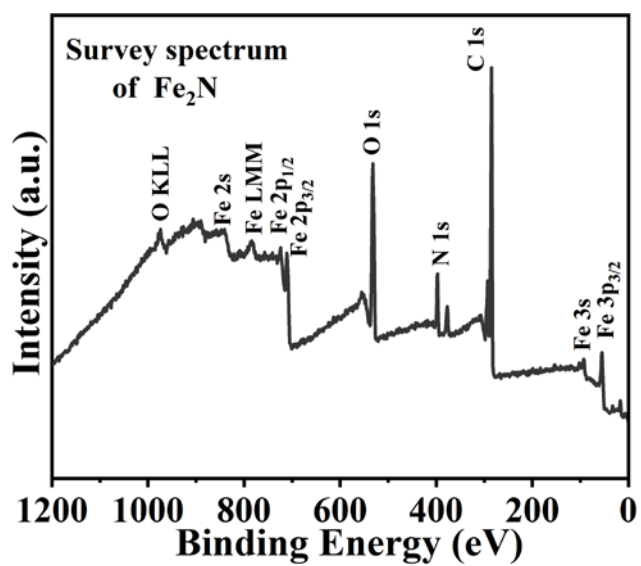

Fig. S3 The X-ray photoelectron survey spectrum of Fe<sub>2</sub>N nanoparticles.

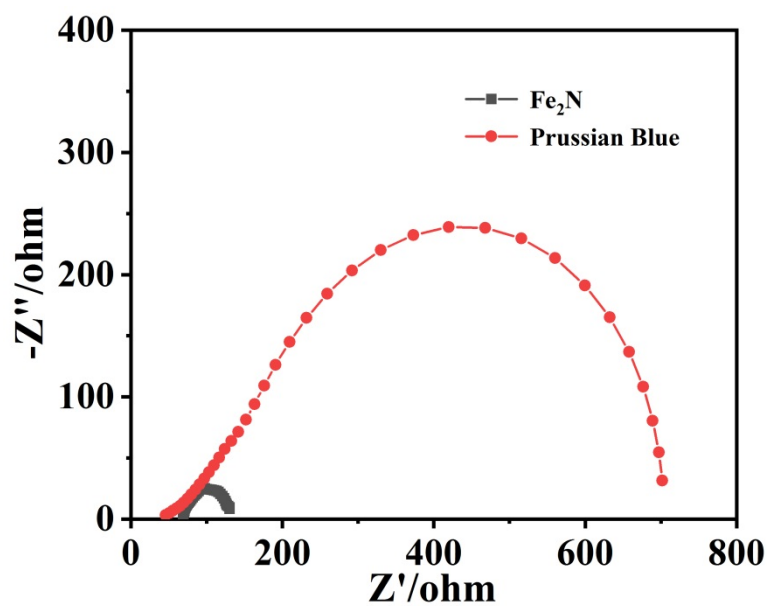

Fig. S4 Electrical impedance spectra of Prussian Blue nanocubes and  $\text{Fe}_2\text{N}$  nanoparticles.

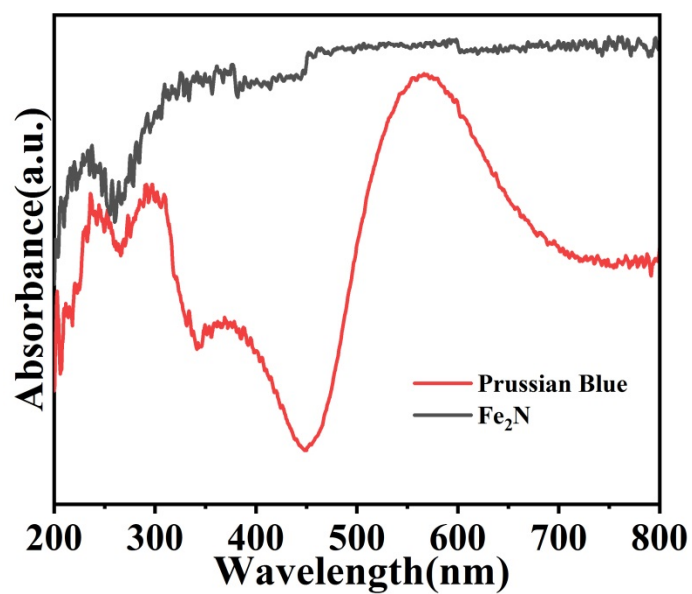

Fig. S5 UV-vis absorption spectra of Prussian Blue nanocubes and  $\text{Fe}_2\text{N}$  nanoparticles.

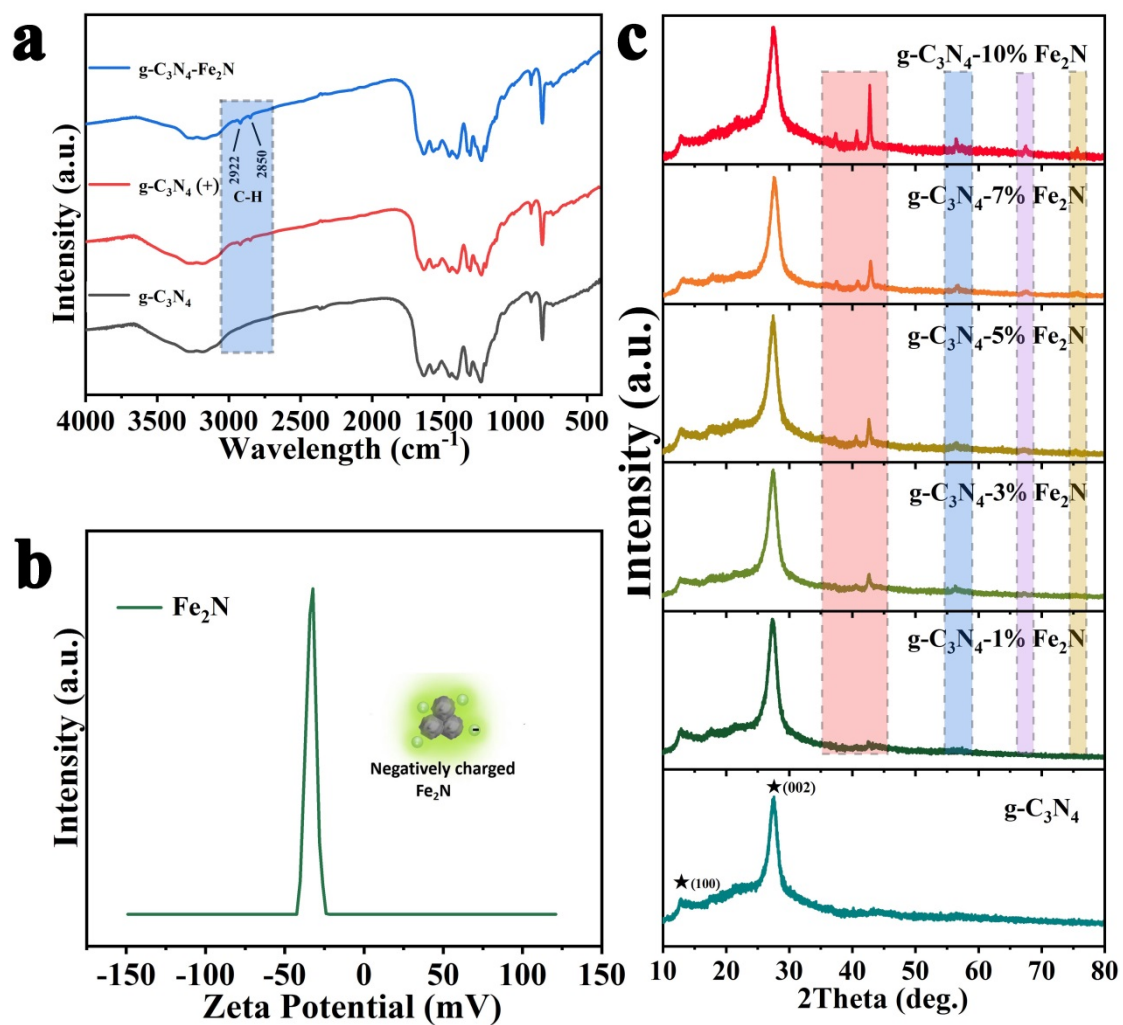

**Fig. S6** (a) The FT-IR spectra of pure  $\text{g-C}_3\text{N}_4$ , CTAB modified  $\text{g-C}_3\text{N}_4$  and  $\text{g-C}_3\text{N}_4\text{-Fe}_2\text{N}$  nanocomposites. (b) Zeta potential measurements of  $\text{Fe}_2\text{N}$  nanoparticles. (c) XRD pattern of pure  $\text{g-C}_3\text{N}_4$  and a series of  $\text{g-C}_3\text{N}_4\text{-Fe}_2\text{N}$  nanocomposites.



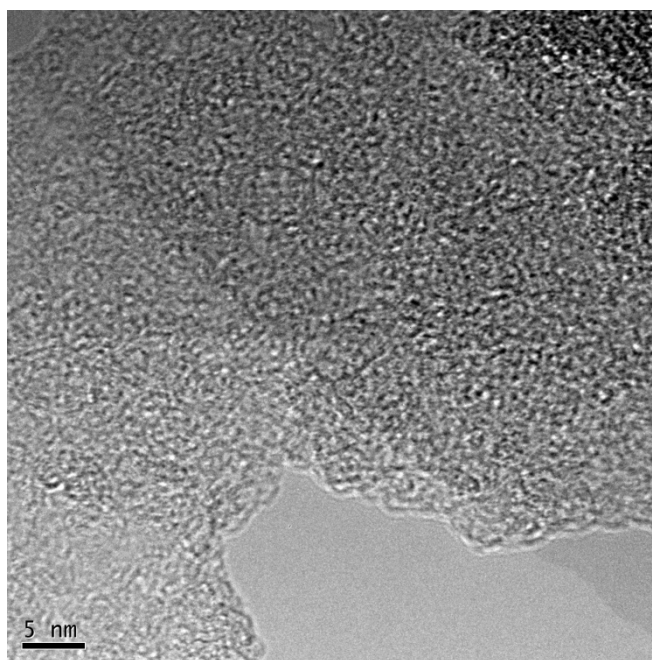

**Fig. S7** HRTEM image of pure g-C<sub>3</sub>N<sub>4</sub> nanosheets.

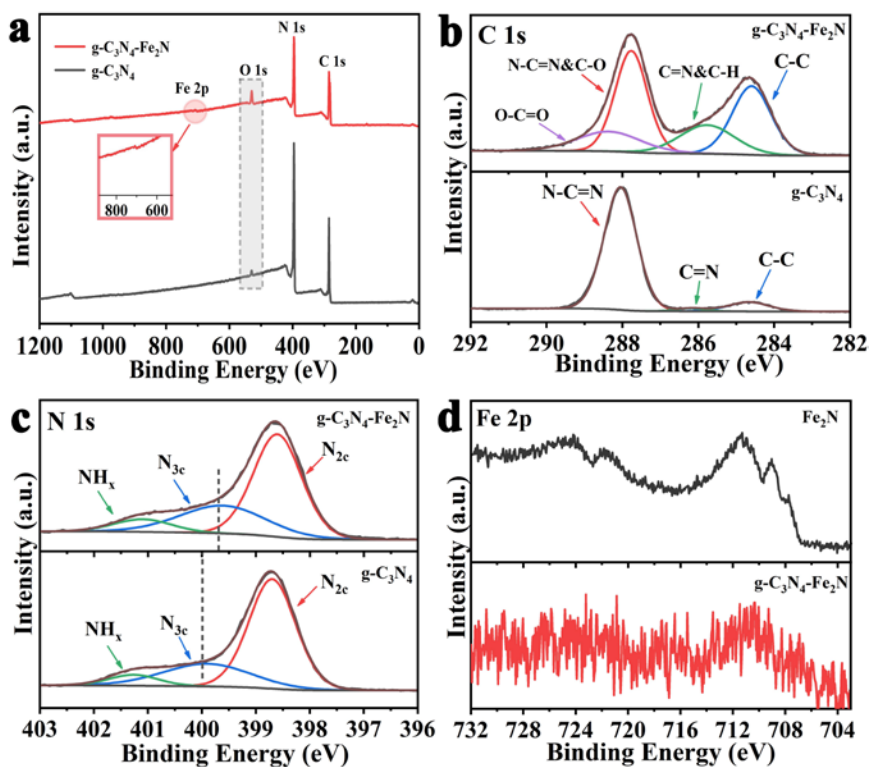

**Fig. S8** (a) The X-ray photoelectron survey spectrum of  $g\text{-C}_3\text{N}_4$  and  $g\text{-C}_3\text{N}_4\text{-Fe}_2\text{N}$ . High-resolution spectrum of (b) C 1s and (c) N 1s for  $g\text{-C}_3\text{N}_4$  and  $g\text{-C}_3\text{N}_4\text{-Fe}_2\text{N}$ . High-resolution spectrum of (d) Fe 2P for  $g\text{-C}_3\text{N}_4\text{-Fe}_2\text{N}$  and pure  $\text{Fe}_2\text{N}$ .

**Note:** The peak of O 1s of the  $g\text{-C}_3\text{N}_4\text{-Fe}_2\text{N}$  nanocomposite is an obvious stronger than that of the pure  $g\text{-C}_3\text{N}_4$ , in the survey spectrum. It has been proved to be the result of the modification on the surface of the  $g\text{-C}_3\text{N}_4$  by the CTAB. Meanwhile, the  $g\text{-C}_3\text{N}_4\text{-Fe}_2\text{N}$  nanocomposite has an extra peak at 708 eV corresponding to the Fe 2p.

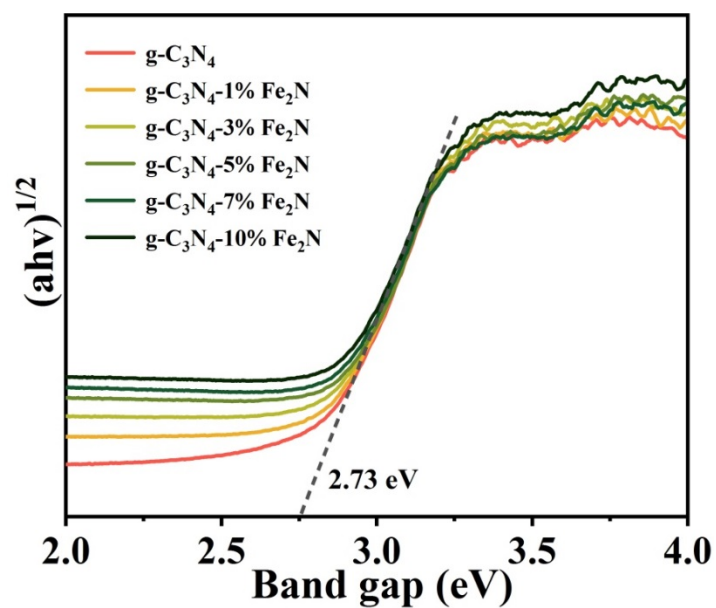

Fig. S9 Tauc plots of the UV-vis spectra for a series of samples.

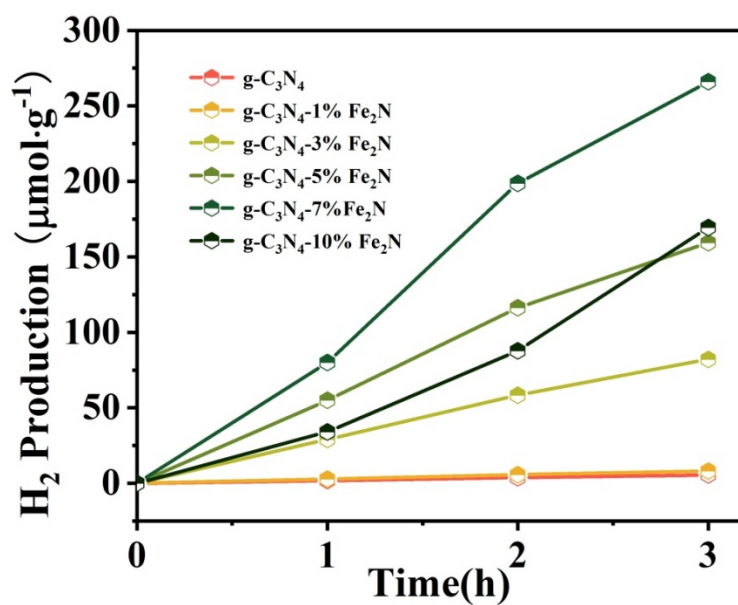

Fig. S10 Time-dependent photocatalytic H<sub>2</sub> evolution over the g-C<sub>3</sub>N<sub>4</sub>-Fe<sub>2</sub>N nanocomposites with different ratio of Fe<sub>2</sub>N.

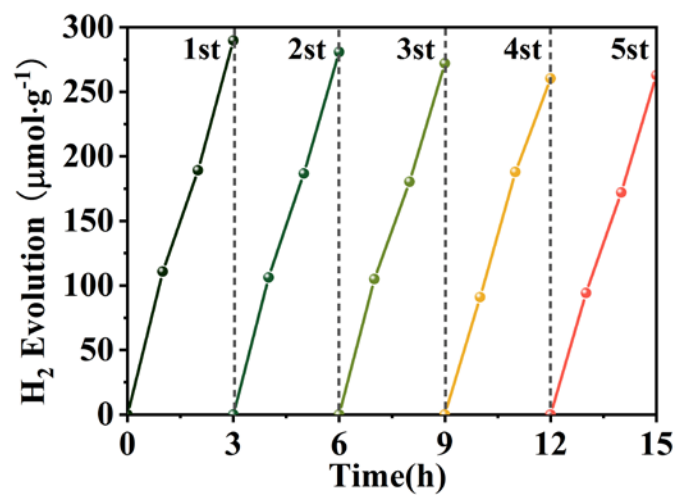

Fig. S11 Stability examination of H<sub>2</sub> production (evacuation every 3 h) for the g-C<sub>3</sub>N<sub>4</sub>-7%Fe<sub>2</sub>N sample.

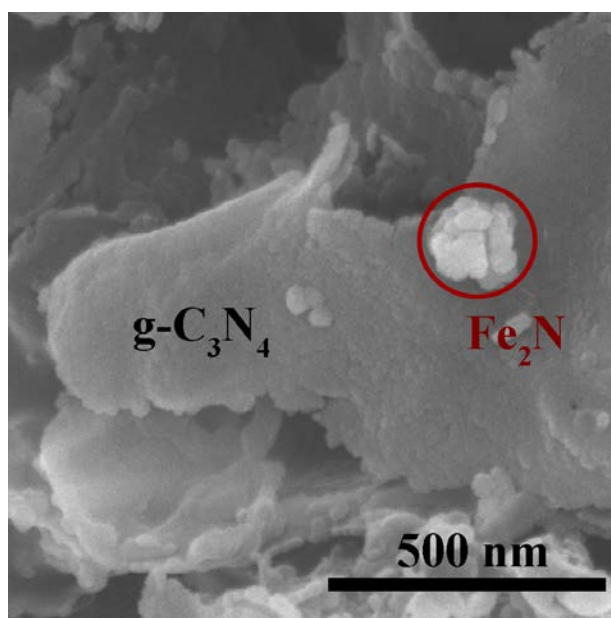

Fig. S12. The SEM image of the reacted g-C<sub>3</sub>N<sub>4</sub>-7%Fe<sub>2</sub>N sample.

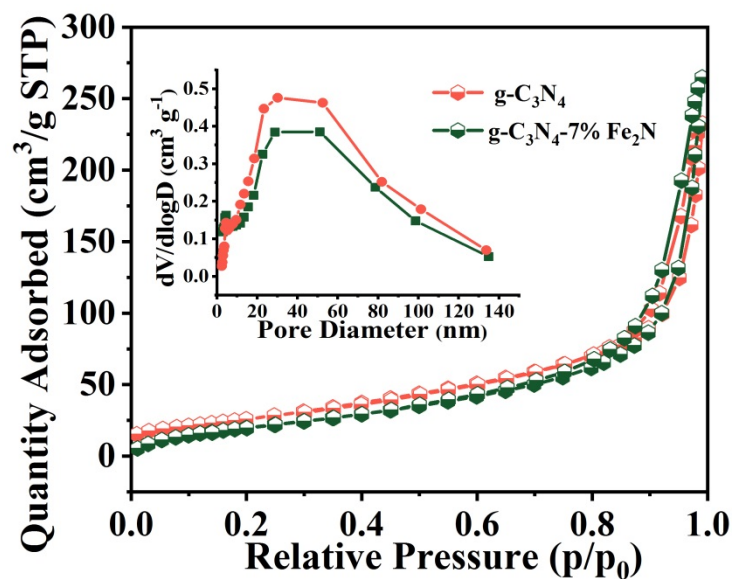

Fig. S13.  $N_2$  adsorption–desorption isotherms and the corresponding pore size distribution curves (inset) of  $g-C_3N_4$  and  $g-C_3N_4-7\%Fe_2N$ .

Table S1. Pore Structure Parameters of  $g-C_3N_4$  and  $g-C_3N_4-7\%Fe_2N$ .

| Photocatalyst       | BET surface area<br>( $m^2 g^{-1}$ ) | mean pore<br>diameter (nm) | pore volume<br>( $cm^3 g^{-1}$ ) |
|---------------------|--------------------------------------|----------------------------|----------------------------------|
| $g-C_3N_4$          | 97.96                                | 14.66                      | 0.38                             |
| $g-C_3N_4-7\%Fe_2N$ | 81.11                                | 16.49                      | 0.44                             |

**Table S2.** Representative summary on photocatalytic activity of non-noble based photocatalysts toward water splitting H<sub>2</sub> evolution.

| Photocatalyst                       | Co-catalysts/<br>mass ratio                                 | Light source               | Reaction conditions                                                                               | PHER<br>rate <sup>a</sup> | Ref.                 |
|-------------------------------------|-------------------------------------------------------------|----------------------------|---------------------------------------------------------------------------------------------------|---------------------------|----------------------|
| g-C <sub>3</sub> N <sub>4</sub>     | Ni <sub>x</sub> P <sub>y</sub> /5 wt%                       | Xe light 300W,<br>λ>420 nm | Aqueous TEOA solution<br>(25%)                                                                    | 34                        | [S1]                 |
| CdS                                 | NiC /1 wt%                                                  | Xe light 350W,<br>λ>420 nm | Aqueous solution of<br>Na <sub>2</sub> S (0.25 M) and<br>Na <sub>2</sub> SO <sub>3</sub> (0.25 M) | 7.76                      | [S2]                 |
| CdS/g-C <sub>3</sub> N <sub>4</sub> | Ni(OH) <sub>2</sub> / 4.76<br>wt%                           | Xe light 300W,<br>λ>420 nm | Aqueous solution of<br>Na <sub>2</sub> S (0.5 M) and Na <sub>2</sub> SO <sub>3</sub><br>(0.7 M)   | 25.65                     | [S3]                 |
| ZnIn <sub>2</sub> S <sub>4</sub>    | MoC-QDs/C /<br>2.5 wt%                                      | Xe light 300W,<br>λ>400 nm | Aqueous lactic acid<br>solution (10%)                                                             | 48                        | [S4]                 |
| g-C <sub>3</sub> N <sub>4</sub>     | CoO                                                         | Xe light 300W,<br>λ>400 nm | Aqueous lactic acid<br>solution (10%)                                                             | 3                         | [S5]                 |
| CdS                                 | Mo <sub>2</sub> C@C /<br>2 wt%                              | Xe light 300W,<br>λ>420 nm | Aqueous lactic acid<br>solution (10%)                                                             | 26                        | [S6]                 |
| g-C <sub>3</sub> N <sub>4</sub>     | Ni <sub>x</sub> Co <sub>1-x</sub> S <sub>2</sub> /<br>5 wt% | White LED,<br>λ>420 nm     | Aqueous TEOA solution<br>(15%), Eosin Y-sensitized<br>catalyst (10mg)                             | 9.08                      | [S7]                 |
| CdS                                 | MoS <sub>2</sub> / 2 wt%                                    | Xe light 300W,<br>λ>420 nm | Aqueous lactic acid<br>solution (10%)                                                             | 64.9                      | [S8]                 |
| g-C <sub>3</sub> N <sub>4</sub>     | Fe <sub>2</sub> N / 7 wt%                                   | Xe light 300W,<br>λ>400 nm | Aqueous TEOA solution<br>(10%)                                                                    | <b>48</b>                 | <b>This<br/>work</b> |

**Note:** <sup>a</sup>PHER rate denotes the hydrogen evolution rate of times higher than pristine photocatalyst.

### III. Supplementary References:

- [S1] Z. Sun, M. Zhu, M. Fujitsuka, A. Wang, C. Shi, T. Majima, *ACS Appl Mater Interfaces*, 9 (2017) 30583-30590.
- [S2] S. Ma, Y. Deng, J. Xie, K. He, W. Liu, X. Chen, X. Li, *Applied Catalysis B: Environmental*, 227 (2018) 218-228.
- [S3] Z. Yan, Z. Sun, X. Liu, H. Jia, P. Du, *Nanoscale*, 8 (2016) 4748-4756.
- [S4] F. Gao, Y. Zhao, L. Zhang, B. Wang, Y. Wang, X. Huang, K. Wang, W. Feng, P. Liu, *Journal of Materials Chemistry A*, 6 (2018) 18979-18986.
- [S5] Z. Mao, J. Chen, Y. Yang, D. Wang, L. Bie, B.D. Fahlman, *ACS Appl Mater Interfaces*, 9 (2017) 12427-12435.
- [S6] Y.-X. Pan, J.-B. Peng, S. Xin, Y. You, Y.-L. Men, F. Zhang, M.-Y. Duan, Y. Cui, Z.-Q. Sun, J. Song, *ACS Sustainable Chemistry & Engineering*, 5 (2017) 5449-5456.
- [S7] K. Fan, Z. Jin, H. Yang, D. Liu, H. Hu, Y. Bi, *Sci Rep*, 7 (2017) 7710.
- [S8] B. Han, S. Liu, Y.-J. Xu, Z.-R. Tang, *Applied Catalysis B: Environmental*, 202 (2017) 298-304.
